# Supplementary material
Source: PubMed Central journal article supplement (PMC7967086)
Supplement: jama-e211489-s003.pdf [file jama-e211489-s003.pdf]

## Supplemental Online Content

Albert CM, Cook NR, Pester J, et al. Effect of marine omega-3 fatty acid and vitamin D supplementation on incident atrial fibrillation: a randomized clinical trial. *JAMA*. Published March 16, 2021. doi:10.1001/jama.2021.1489

**eAppendix.** CMS Linkage Methods Used in the VITAL Study

**eTable.** Characteristics of Incident Atrial Fibrillation

**eFigure.** Cumulative Incidence of Atrial Fibrillation According to Four Treatment Groups

**Members of the VITAL Research Group**

This supplemental material has been provided by the authors to give readers additional information about their work.

## **eAppendix.** CMS Linkage Methods Used in the VITAL Study

To supplement the yearly ascertainment of AF from follow-up questionnaires, we have ascertained inpatient and outpatient AF diagnoses (ICD-9 diagnosis code 427.31 and ICD-10 diagnosis code I48.91) and atrial flutter (ICD-9 diagnosis code 427.32 and ICD-10 diagnosis code I48.92) by linking claims data from the Centers for Medicare and Medicaid Services (CMS). Medicare is a US federal health insurance program that reimburses medical costs for most citizens and permanent residents aged  $\geq 65$  years, as well as some younger people with disabilities. Annual CMS data becomes available 11-12 months after the end of a calendar year, and this analysis includes CMS data from 2011-2017.

On an annual basis, the VITAL trial obtained Identifiable (Medicare) Data Files through ResDAC ([www.resdac.unm.edu/Index.asp](http://www.resdac.unm.edu/Index.asp)), which is a Centers for Medicare and Medicaid Services (CMS) contractor that provides free assistance to academic and non-profit researchers interested in using Medicare or Medicaid data. VITAL participants were informed of our intention to use this methodology to ascertain their claims data from CMS through a study newsletter and were given the option to opt out. The data use agreement (DUA) delineates the confidentiality requirements of the Privacy Act and data release policies and procedures.

The CMS linkage was performed by social security number (SSN). A finder file with complete, 9-digit SSNs was sent to CMS, and CMS matched SSN to their data sets and provided us with a crosswalk file SSN - BENE\_ID (beneficiary ID uniquely created for the VITAL linkage). Data obtained included Medicare Provider and Analysis Review (MedPar) files with inpatient hospital and skilled nursing facility stay records, and Standard Analytical Files (SAFs) for outpatient and non-institutional claims. Emergency room visits are included in the MedPAR files and the outpatient SAFs.

All requested data sets (Medpar/inpatient claims, outpatient, carrier/non-institutional claims) were identified by BENE\_ID, while the SSN is only included in the crosswalk. Data was provided on a DVD as a text file, then converted to a SAS data set, which was then linked back to the participant's study record. AF diagnosis reports and treatment dates were cross-checked with self-reports to identify any potential AF case/recurrence not already ascertained. We then used the same follow-up procedures as outlined in the manuscript to obtain medical records and adjudicate events.

**eTable.** Characteristics of Incident Atrial Fibrillation

| <b>Characteristic</b>                                 | <b>No. (%)</b> |
|-------------------------------------------------------|----------------|
| How AF confirmed                                      |                |
| ECG                                                   | 656 (72.9)     |
| Medical record report                                 | 244 (27.1)     |
| Pattern of AF <sup>a</sup>                            |                |
| Paroxysmal <sup>b</sup>                               | 526 (58.4)     |
| Persistent <sup>c</sup>                               | 262 (29.1)     |
| Long-standing persistent <sup>d</sup>                 | 84 (9.3)       |
| Unable to be classified                               | 28 (3.1)       |
| Symptoms present at diagnosis                         |                |
| Yes                                                   | 557 (61.9)     |
| No                                                    | 247 (27.4)     |
| Unclear                                               | 96 (10.7)      |
| Symptoms may have preceded randomization <sup>e</sup> | 58 (6.4)       |
| AF post-cardiac surgery                               | 66 (7.3)       |
| Atrial flutter only                                   | 52 (5.8)       |
| LVEF on echo available                                | 775 (86.1)     |
| LVEF percentage, mean (SD) <sup>f</sup>               | 57.2 (10.9)    |

Abbreviations: AF, atrial fibrillation; ECG, electrocardiogram, LVEF, left ventricular ejection fraction

- a. Pattern of AF at the time of diagnosis was classified in accordance with ACC/AHA/HRS and ESC guidelines.<sup>19,20</sup>
- b. Self terminating episode(s) of AF lasting 7 days or less which may be recurrent
- c. Duration of AF lasting for more than 7 days
- d. Duration of AF estimated to have been greater than 1 year.
- e. participant experienced symptoms which could have been secondary to AF or palpitations prior to randomization, but was not officially diagnosed until after randomization.
- f. LVEF closest to time of presentation, with consideration of the possibility of tachycardic myopathy at presentation. If two EF measurements are available within 3 months of the AF presentation and the EF has improved in the interim, the higher EF was chosen.

**eFigure.** Cumulative Incidence of Atrial Fibrillation According to Four Treatment Groups

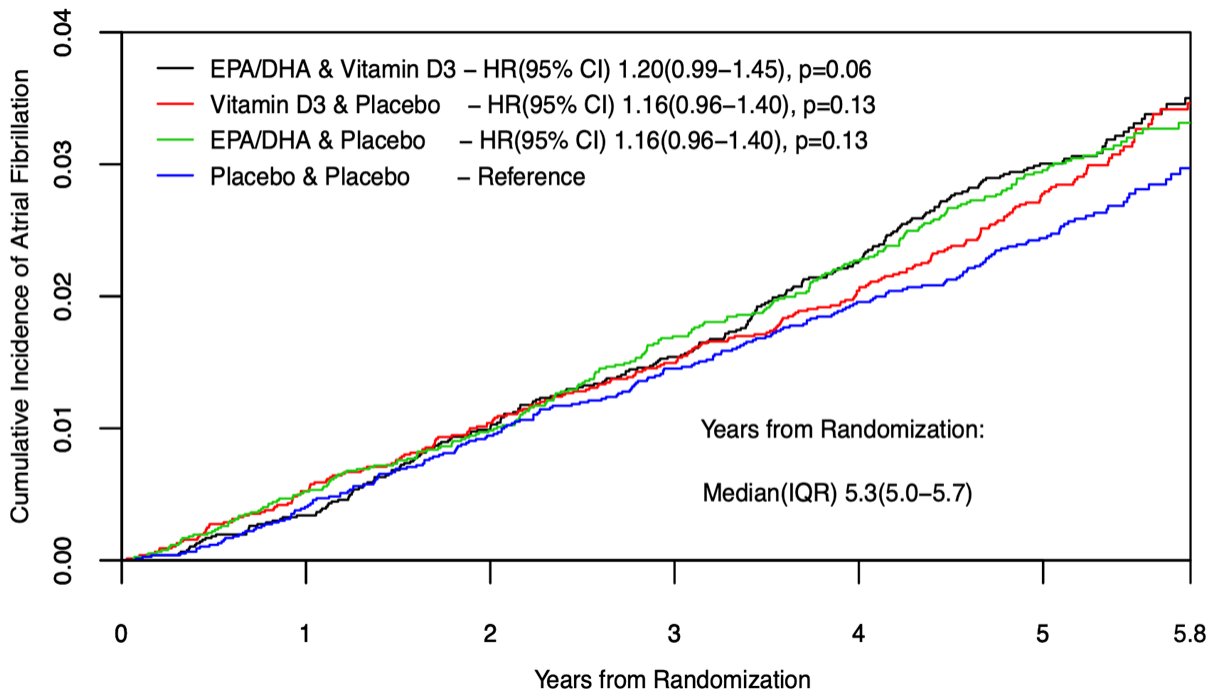

Cumulative incidence of the primary endpoint according to four group randomized treatment assignment to EPA/DHA, Vitamin D<sub>3</sub>, and respective placebo derived from Cox regression models that were controlled for age, sex, and randomization group.

## **Members of the VITAL Research Group**

### **VITAL Steering Committee:**

JoAnn E. Manson (Chair), Julie E. Buring (Chair), Nancy R. Cook, I-Min Lee, William Christen, Shari S. Bassuk, Samia Mora, Heike Gibson, David Gordon, Trisha Copeland, Denise D'Agostino, Georgina Friedenber, Claire Ridge, Vadim Bubes, Edward L. Giovannucci, Walter C. Willett (all at Brigham and Women's Hospital, Harvard Medical School, Boston; Drs. Manson, Buring, Cook, Lee, Giovannucci and Willett are also at the Harvard T.H. Chan School of Public Health).

### **Scientific consultants:**

John Baron (University of North Carolina, Chapel Hill),  
Michael Holick (Boston Medical Center), Bruce Hollis (University of South Carolina).

### **Members of the VITAL Trial Research Group:**

(Brigham and Women's Hospital): I-Min Lee, William Christen, Shari Bassuk, David Gordon, Trisha Copeland, Denise D'Agostino, Georgina Friedenber, Vadim Bubes, Edward Giovannucci, Walter Willett, Diane Gold, Meryl LeBoff, Olivia Okereke, Aruna Pradhan, Howard Sesso, Wendy Chen, Paulette Chandler, J. Michael Gaziano, Olga Demler, Kathryn Rexrode, Karen Costenbader, John Forman, Erik Alexander, Sonia Friedman, Jeffrey Katz, Shumin Zhang, Jennifer Lin, Joseph Walter, Julie Duszlak, Kate Kalan, Jean MacFadyen, Natalya Gomelskaya, David Bates, Ara Sarkissian, Mary Breen, Yeulolani Andrade, Manickavasagar Vinayagamoorthy, Chunying Li, Eunjung Kim, Franco Giulianini, Gregory Kotler, Marty Van Denburgh, Rimma Dushkes, Yanyan Liu, Eduardo Pereira, Lisa Fields-Johnson, George Menjin, Lucy Liu, Lauren Girard, Scott Zeller, Naomi Riches, Katelyn Hasson, Ellen Bhang, Maria Revilla, Elena McCarthy, Alex Moran, Kristen Haise, Leah Arsenault, Philomena Quinn, Sancia Grimes, Ivan Fitchorov, Kurt Schwerin, Shamikhah Curry, Annie Murray, Angela Zhang, Diana Walrond-Williams, Alison Weinberg, Chris Pfeffer, Margarete Haubourg, Viviane Nguyen, Henry Ouellette, Rolando Rodriguez, Tony Montgomery, Keith Morse, Vincent Guzman, Megan Perry, Sandra Weekes, Doug Smith, Allison Clar, Sara Curran, Yaneve Fonge, David Hibbert, Louisa Paine, Kelly Royce, Courtney Splaine, Jennifer McMahon, David Eldridge, Laura Hand, Kay Inandan, Meghan Rieu Werden, Harriet Samuelson, Andrea Hrbek, Megan Mele, Eileen Bowes, Mary Anne Ryan  
(Massachusetts General Hospital, Boston): Carlos Camargo, Jacqueline Danik, Ravi Thadhani  
(Vanderbilt University, Nashville): Thomas Wang  
(Rush University Medical Center, Chicago): Raj C. Shah

(University of California, San Francisco): Michelle A. Albert

(Emory University): Carlos Kase

(Centers for Disease Control and Prevention, Vitamin D Standardization Program): Hubert Vesper and Julianne Botelho.

### **Data and Safety Monitoring Board**

Voting members of the data and safety monitoring board for VITAL and the ancillary studies, including the VITAL Rhythm Study, included: Lawrence S. Cohen, MD, Theodore Colton, ScD, Mark A. Espeland, PhD, I. Craig Henderson, MD, Alice H. Lichtenstein, DSc, Rebecca A. Silliman, MD, PhD, and Nanette Wenger, MD (chair). The ex-officio members included: Josephine Boyington, PhD, MPH, Rebecca B. Costello, PhD, Cindy D. Davis, PhD, Lawrence Fine, MD, DrPH, Lori Minasian, MD, Peter Greenwald, MD, Gabriela Riscuta, MD, CNS, and Harold Seifried, MS, PhD.
