# Supplementary material
Source: PubMed Central journal article supplement (PMC7967086)
Supplement: jama-e211489-s004.pdf [file jama-e211489-s004.pdf]

Albert CM, Cook NR, Pester J, et al. Effect of marine omega-3 fatty acid and vitamin D supplementation on incident atrial fibrillation: a randomized clinical trial. *JAMA*. Published March 16, 2021. doi:10.1001/jama.2021.1489

## Data Sharing Statement

### Data

**Data available:** Yes

**Data types:** Deidentified participant data, Data dictionary

**How to access data:** The PI ([Christine.Albert@cshs.org](mailto:Christine.Albert@cshs.org)) can be contacted for de-identified data requests.

**When available:** beginning date: 07-01-2021

### Supporting Documents

**Document types:** None

### Additional Information

**Who can access the data:** Researchers where the proposed use of the data is approved as outlined in the data sharing statement

**Types of analyses:** Analyses will need to be for a specified purpose

**Mechanisms of data availability:** Analyses proposal requests will require review and approval by the VITAL Publications & Presentations Committee and appropriate IRB approval. Once approved and a data access agreement has been executed, deidentified data generated from this research will be made available to affiliated investigators through secure databases for the prespecified analysis
